# Supplementary material
Source: MDPI journal article supplement (https://www.mdpi.com/2073-445X/12/9/1809)
Supplement: s1 [file s1]

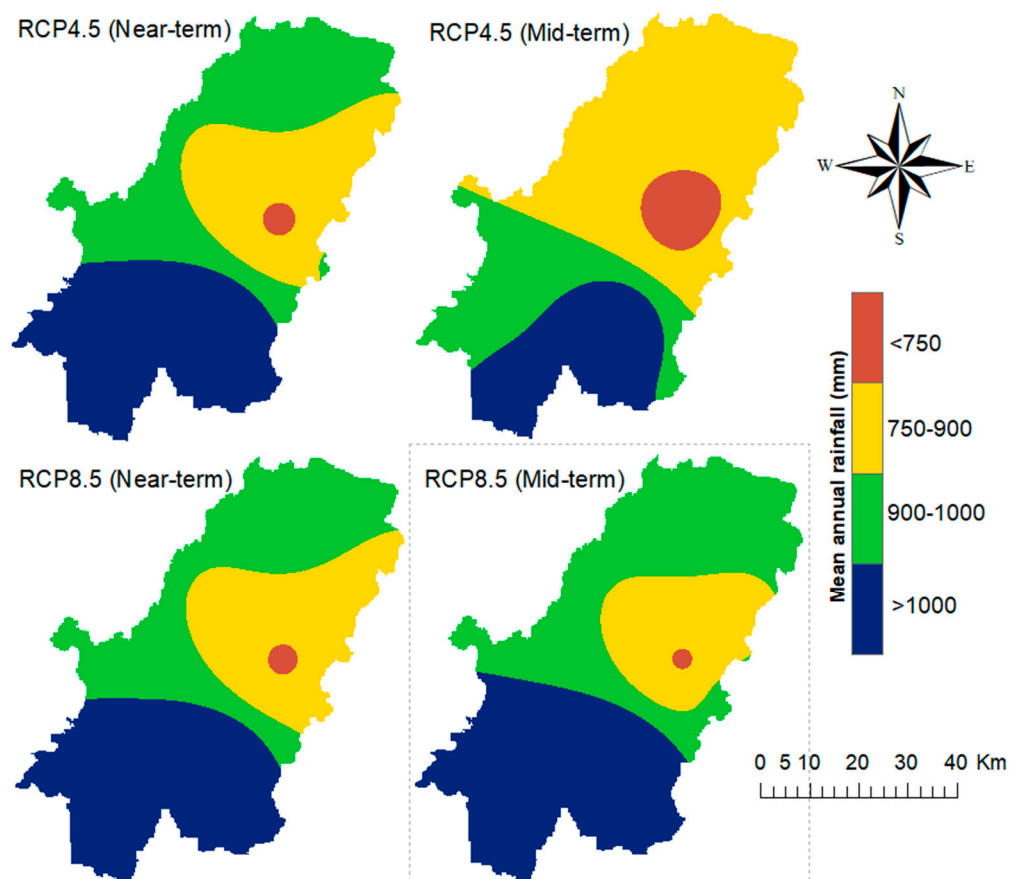

**Figure S1.** The spatial pattern of projected mean annual rainfall under RCP4.5 and RC8.5

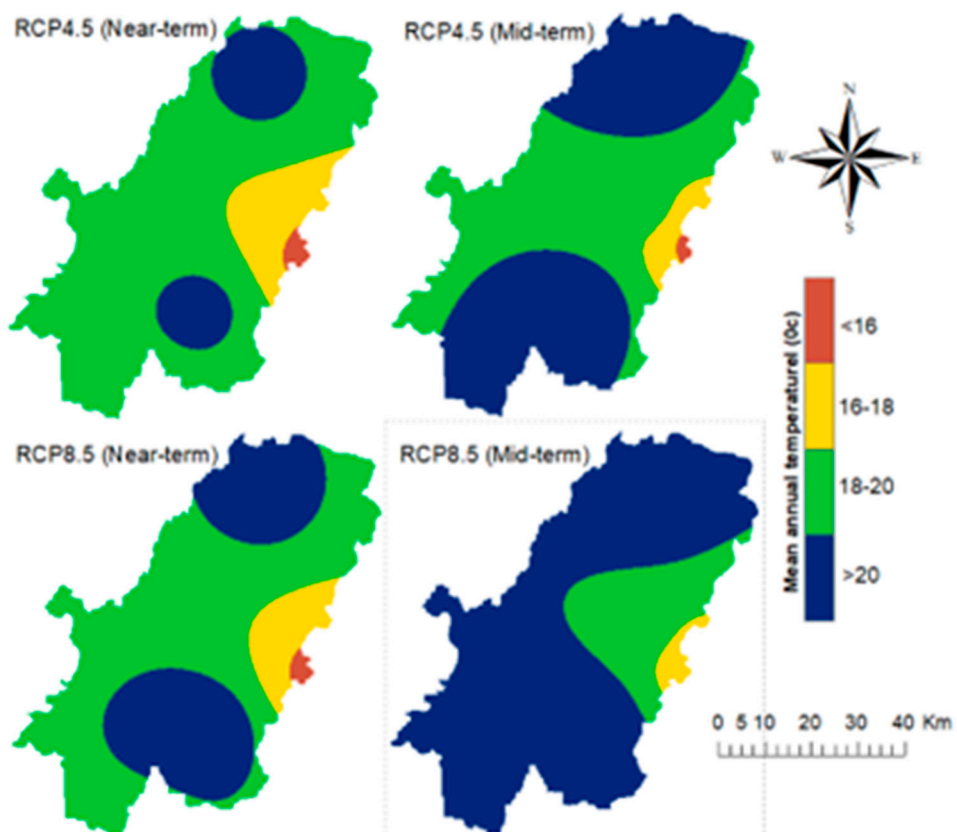

**Figure S2.** The spatial pattern of projected mean annual temperature under RCP4.5 and RC8.5

**Table S1.** Transition area matrix (ha) of LULC between 1985–2003 and 2003–2021

| LULC Class |                  | 2003       |            |          |                  |             |               |              |            |            |          |
|------------|------------------|------------|------------|----------|------------------|-------------|---------------|--------------|------------|------------|----------|
|            |                  | Water body | Grass land | Forest   | Agriculture land | Barren land | Built-up area | Agroforestry | Shrub land | Marsh land | Total    |
| 1985       | Water body       | 88.29      | 1.08       | 0.99     | 0.09             | 0           | 0             | 0            | 0.99       | 0          | 91.44    |
|            | Grass land       | 95.22      | 21002.76   | 2590.65  | 14708.7          | 7834.05     | 80.01         | 574.29       | 14883.66   | 67.05      | 61836.39 |
|            | Forest           | 344.7      | 4499.55    | 32333    | 8690.58          | 125.19      | 137.88        | 20827.35     | 10163.16   | 72.81      | 77194.26 |
|            | Agriculture land | 8.1        | 10312.47   | 8228.61  | 30688.11         | 1703.7      | 160.47        | 5995.71      | 13229.55   | 0.27       | 70326.99 |
|            | Barren land      | 25.38      | 2696.67    | 86.85    | 1044             | 6886.8      | 60.93         | 16.02        | 1634.85    | 56.25      | 12507.75 |
|            | Built-up area    | 0          | 0.18       | 2.25     | 0.09             | 0.18        | 474.93        | 0.09         | 0.72       | 0          | 478.44   |
|            | Agroforestry     | 4.68       | 1863       | 11446.74 | 10855.53         | 40.59       | 88.47         | 17835.21     | 4072.86    | 0.09       | 46207.17 |
|            | Shrub land       | 28.26      | 12347.82   | 14482.8  | 23070.24         | 1469.52     | 173.25        | 9139.68      | 25516.8    | 10.08      | 86238.45 |
|            | Marsh land       | 7.2        | 4.32       | 0.72     | 4.68             | 0.36        | 0             | 0            | 15.21      | 52.92      | 85.41    |
|            | Total            | 601.83     | 52727.85   | 69172.65 | 89062.02         | 18060.39    | 1175.94       | 54388.35     | 69517.8    | 259.47     | 354966.3 |
|            |                  |            |            |          |                  |             |               |              |            |            |          |
| LULC Class |                  | 2021       |            |          |                  |             |               |              |            |            |          |
|            |                  | Water body | Grass land | Forest   | Agriculture land | Barren land | Built-up area | Agroforestry | Shrub land | Marsh land | Total    |
| 2003       | Water body       | 516.96     | 30.87      | 16.47    | 16.02            | 4.32        | 0.36          | 0.27         | 15.84      | 0.72       | 601.83   |
|            | Grass land       | 671.4      | 10591.56   | 2573.55  | 22179.87         | 5150.61     | 294.93        | 2683.08      | 8014.41    | 568.44     | 52727.85 |
|            | Forest           | 1232.64    | 3326.13    | 12149.28 | 21027.06         | 1482.84     | 441.72        | 18520.92     | 10947.06   | 45         | 69172.65 |
|            | Agriculture land | 185.31     | 5393.43    | 9449.46  | 48537.18         | 2797.29     | 570.69        | 15199.56     | 6794.1     | 135        | 89062.02 |
|            | Barren land      | 376.92     | 3470.58    | 209.34   | 5041.17          | 5761.8      | 160.47        | 73.35        | 2375.1     | 591.66     | 18060.39 |
|            | Built-up area    | 0          | 1.98       | 3.87     | 0.72             | 0.45        | 1166.13       | 0.27         | 2.52       | 0          | 1175.94  |
|            | Agroforestry     | 98.73      | 439.92     | 8711.64  | 14089.5          | 220.95      | 195.48        | 29096.1      | 1534.59    | 1.44       | 54388.35 |
|            | Shrub land       | 548.91     | 6844.77    | 6708.69  | 29977.47         | 3976.02     | 349.83        | 5535.99      | 14936.13   | 639.99     | 69517.80 |
|            | Marsh land       | 167.4      | 10.08      | 0.27     | 0                | 2.97        | 0             | 0            | 3.33       | 75.42      | 259.47   |
|            | Total            | 3798.3     | 30109.3    | 39822.6  | 140869.0         | 19397.3     | 3179.6        | 71109.5      | 44623.1    | 2057.7     | 354966.3 |

**Table S2.** Transition area matrix (ha) of LULC between 2021–2035 and 2035–2050

| LULC Class |                  | 2035       |            |          |                  |             |               |              |            |            |          |
|------------|------------------|------------|------------|----------|------------------|-------------|---------------|--------------|------------|------------|----------|
|            |                  | Water body | Grass land | Forest   | Agriculture land | Barren land | Built-up area | Agroforestry | Shrub land | Marsh land | Total    |
| 2021       | Water body       | 3798.27    | 0          | 0        | 0                | 0           | 0             | 0            | 0          | 0          | 3798.27  |
|            | Grass land       | 328.23     | 16743.69   | 0        | 9526.59          | 3044.07     | 144.54        | 0            | 0          | 322.2      | 30109.32 |
|            | Forest           | 688.95     | 1831.86    | 24984.63 | 7534.44          | 756.63      | 226.98        | 1071.27      | 2719.89    | 7.92       | 39822.57 |
|            | Agriculture land | 197.19     | 0          | 0        | 112737.51        | 4197.87     | 802.98        | 22764.42     | 0          | 169.02     | 140869   |
|            | Barren land      | 120.24     | 0          | 0        | 4992.84          | 13477.23    | 155.16        | 0            | 0          | 651.78     | 19397.25 |
|            | Built-up area    | 0          | 0          | 0        | 0                | 0           | 3179.61       | 0            | 0          | 0          | 3179.61  |
|            | Agroforestry     | 0          | 0          | 0        | 17386.29         | 156.42      | 213.3         | 53353.53     | 0          | 0          | 71109.54 |
|            | Shrub land       | 276.66     | 4484.61    | 0        | 19138.86         | 2539.08     | 191.88        | 2936.16      | 14640.84   | 414.99     | 44623.08 |
|            | Marsh land       | 651.24     | 73.44      | 0        | 0                | 22.05       | 0             | 0            | 20.79      | 1290.15    | 2057.67  |
| Total      |                  | 6060.78    | 23133.6    | 24984.63 | 171316.53        | 24193.35    | 4914.45       | 80125.38     | 17381.52   | 2856.06    | 354966.3 |
|            |                  |            |            |          |                  |             |               |              |            |            |          |
|            |                  | 2050       |            |          |                  |             |               |              |            |            |          |
|            |                  | Water body | Grass land | Forest   | Agriculture land | Barren land | Built-up area | Agroforestry | Shrub land | Marsh land | Total    |
| 2035       | Water body       | 5752.62    | 96.12      | 0        | 0.9              | 58.68       | 0             | 0            | 144.45     | 8.01       | 6060.78  |
|            | Grass land       | 472.5      | 9094.68    | 0        | 13111.29         | 138.96      | 20.88         | 21.96        | 260.37     | 12.96      | 23133.6  |
|            | Forest           | 3.6        | 960.39     | 9242.91  | 8633.52          | 480.24      | 159.57        | 4308.66      | 1128.78    | 66.96      | 24984.63 |
|            | Agriculture land | 775.53     | 3.51       | 0        | 157583.7         | 2388.42     | 867.78        | 9610.56      | 86.4       | 0.63       | 171316.5 |
|            | Barren land      | 484.65     | 19.35      | 0        | 3420.54          | 19830.78    | 80.64         | 0            | 13.32      | 344.07     | 24193.35 |
|            | Built-up area    | 2.7        | 0          | 0        | 8.1              | 11.88       | 4891.68       | 0.09         | 0          | 0          | 4914.45  |
|            | Agroforestry     | 0          | 0          | 0        | 7709.67          | 234.18      | 523.62        | 71615.25     | 0          | 42.66      | 80125.38 |
|            | Shrub land       | 231.66     | 410.85     | 0        | 4397.58          | 305.19      | 168.57        | 3749.76      | 8113.41    | 4.5        | 17381.52 |
|            | Marsh land       | 1295.19    | 4.32       | 0        | 18.27            | 30.78       | 0.18          | 0            | 39.42      | 1467.9     | 2856.06  |
| Total      |                  | 9018.45    | 10589.22   | 9242.91  | 194883.57        | 23479.11    | 6712.92       | 89306.28     | 9786.15    | 1947.69    | 354966.3 |

**Table S3.** Summary of land degradation indicators based on SDG 15.3.1

| Land degradation indicator              | 1985-2003       |                         | 2003-2021       |                         |
|-----------------------------------------|-----------------|-------------------------|-----------------|-------------------------|
|                                         | Area<br>(sq km) | Percent of<br>land area | Area<br>(sq km) | Percent of<br>land area |
| LP indicator                            |                 |                         |                 |                         |
| Land area with improved productivity    | 38.8            | 1.58%                   | 4.3             | 0.17%                   |
| Land area with stable productivity      | 2,045.2         | 83.21%                  | 1,642.3         | 66.81%                  |
| Land area with degraded productivity    | 359.0           | 14.61%                  | 796.5           | 32.40%                  |
| Land area with no data for productivity | 14.9            | 0.61%                   | 14.9            | 0.61%                   |
| Total land area                         | 2,458.0         | 100%                    | 2,458.0         | 100.00%                 |
| LC indicator                            |                 |                         |                 |                         |
| Land area with improved land cover      | 305.1           | 12.41%                  | 262.5           | 10.68%                  |
| Land area with stable land cover        | 1,270.6         | 51.69%                  | 1,156.3         | 47.04%                  |
| Land area with degraded land cover      | 882.4           | 35.90%                  | 1039.2          | 42.28%                  |
| Land area with no data for land cover   | 0.0             | 0.00%                   | 0.0             | 0.00%                   |
| Total land area                         | 2,458.0         | 100.00%                 | 2,458.0         | 100.00%                 |
| SOC indicator                           |                 |                         |                 |                         |
| Land area with improved SOC             | 306.7           | 12.5%                   | 291             | 11.84%                  |
| Land area with stable SOC               | 1290.4          | 52.5%                   | 1,196.10        | 48.66%                  |
| Land area with degraded SOC             | 848.6           | 34.52%                  | 958.6           | 39.00%                  |
| Land area with no data for SOC          | 12.3            | 0.50%                   | 12.3            | 0.50%                   |
| Total land area                         | 2458.0          | 100.00%                 | 2458.0          | 100.00%                 |
| Combined indicators                     |                 |                         |                 |                         |
| Land area improved                      | 336.8           | 13.70%                  | 305.2           | 12.42%                  |
| Land area stable                        | 1,005.8         | 40.92%                  | 758.2           | 30.85%                  |
| Land area degraded                      | 1,096.6         | 44.61%                  | 1,375.80        | 55.97%                  |
| Land area with no data                  | 18.8            | 0.76%                   | 18.8            | 0.76%                   |
| Total land area                         | 2,458.0         | 100.00%                 | 2,458.0         | 100.00%                 |
